# Supplementary material for: By-Product Revalorization: Cava Lees Can Improve the Fermentation Process and Change the Volatile Profile of Bread
Source: MDPI journal article supplement (doi:10.3390/foods11091361), 2022-05-07
Supplement: s1 [file s1]

## Supplementary Material

**Table S1.** Main volatile compounds identified in Cava lees.

| Compound               | CAS-Num.   | Odor <sup>1</sup>                              | Relative peak area abundance |
|------------------------|------------|------------------------------------------------|------------------------------|
| <b>ALCOHOLS</b>        |            |                                                |                              |
| 3-methyl-1-butanol     | 123-51-3   | fusel, oil, alcoholic, whiskey, fruity, banana | 2.03 ± 0.62                  |
| 1-Hexanol              | 111-27-3   | sweet, resin, flower                           | 0.40 ± 0.07                  |
| 1-Octanol              | 111-87-5   | moss, nut, mushroom, chemical                  | 0.18 ± 0.02                  |
| 2-Dodecanol            | 10203-28-8 | -                                              | 0.16 ± 0.01                  |
| 1-Decanol              | 112-30-1   | fatty, waxy, floral, orange, sweet             | 0.34 ± 0.03                  |
| Phenethyl alcohol      | 60-12-8    | floral, rose                                   | 1.07 ± 0.34                  |
| <i>Total Alcohols</i>  |            |                                                | <i>4.18 ± 1.09</i>           |
| <b>ACIDS</b>           |            |                                                |                              |
| Acetic acid            | 64-19-7    | pungent, sour                                  | 0.46 ± 0.11                  |
| Octanoic acid          | 124-07-2   | oily, rancid                                   | 16.25 ± 4.74                 |
| Decanoic acid          | 334-48-5   | sour, fatty                                    | 15.68 ± 5.84                 |
| Dodecanoic acid        | 143-07-7   | mild, fatty, coconut, oily                     | 1.63 ± 0.17                  |
| Hexadecanoic acid      | 57-10-3    | -                                              | 0.35 ± 0.05                  |
| <i>Total Acids</i>     |            |                                                | <i>34.37 ± 10.91</i>         |
| <b>ALDEHYDES</b>       |            |                                                |                              |
| Nonanal                | 124-19-6   | piney, floral, citrusy, fat                    | 0.53 ± 0.27                  |
| Decanal                | 112-31-2   | beefy, musty, marine, cucumber                 | 0.46 ± 0.07                  |
| Benzaldehyde           | 100-52-7   | cherry, candy                                  | 0.38 ± 0.03                  |
| <i>Total Aldehydes</i> |            |                                                | <i>1.37 ± 0.37</i>           |
| <b>KETONES</b>         |            |                                                |                              |
| 2-Undecanone           | 112-12-9   | citrus, rose, iris                             | 0.30 ± 0.01                  |
| <i>Total Ketones</i>   |            |                                                | <i>0.30 ± 0.01</i>           |
| <b>ESTERS</b>          |            |                                                |                              |
| Isoamyl acetate        | 123-92-2   | sweet, fruity, banana                          | 1.13 ± 0.72                  |
| Hexyl acetate          | 142-92-7   | sweet, fruity, herb                            | 1.23 ± 0.39                  |
| Ethyl octanoate        | 106-32-1   | fruity, floral                                 | 14.48 ± 0.35                 |
| Isoamyl octanoate      | 2035-99-6  | sweet, oily, fruity, green, pineapple, coconut | 2.74 ± 0.29                  |
| Octyl acetate          | 112-14-1   | fruity, fatty                                  | 0.37 ± 0.16                  |
| Methyl decanoate       | 110-42-9   | oily, wine, fruity, floral                     | 0.16 ± 0.09                  |
| Ethyl decanoate        | 110-38-3   | sweet, oily, nutlike                           | 27.27 ± 5.58                 |
| Dodecyl acetate        | 112-66-3   | sweet, fresh                                   | 0.90 ± 0.16                  |
| Decyl acetate          | 112-17-4   | sweet, fatty, fruity                           | 1.02 ± 0.61                  |
| Ethyl 9-decenoate      | 67233-91-4 | fruity, fatty                                  | 0.86 ± 0.04                  |
| Phenethyl acetate      | 103-45-7   | floral, rose, sweet, honey, fruity, tropical   | 1.54 ± 0.07                  |
| Ethyl laurate          | 106-33-2   | sweet, waxy, creamy, floral                    | 5.98 ± 0.61                  |
| Isoamyl decanoate      | 2306-91-4  | waxy, banana, fruity, sweet, cognac, green     | 1.06 ± 0.05                  |
| Ethyl decanoate        | 628-97-7   | waxy, fruity, creamy, vanilla, balsamic        | 0.58 ± 0.03                  |

|                                              |            |                                        |              |
|----------------------------------------------|------------|----------------------------------------|--------------|
| Ethyl 9-hexadecenoate                        | 54546-22-4 | -                                      | 0.90 ± 0.03  |
| <i>Total Esters</i>                          |            |                                        | 60.22 ± 9.18 |
| TERPENES & NORISOPRENOIDS                    |            |                                        |              |
| Vitispirane A                                | 65416-59-3 | floral, fruity, earthy, woody          | 2.63 ± 0.20  |
| 1,1,6-trimethyl-1,2-dihydronaphthalene (TDN) | 30364-38-6 | licorice                               | 8.06 ± 0.08  |
| β-Caryophyllene                              | 87-44-5    | sweet, woody, spice, clove             | 0.12 ± 0.01  |
| Farnesol                                     | 4602-84-0  | fresh, sweet, linden, floral, angelica | 0.46 ± 0.02  |
| Isocaryophyllene                             | 118-65-0   | woody, spicy                           | 0.40 ± 0.02  |
| Nerolidol                                    | 7212-44-4  | floral, green, waxy, citrus, woody     | 0.27 ± 0.08  |
| <i>Total Terpenes</i>                        |            |                                        | 11.94 ± 0.41 |

<sup>1</sup> From [27]. The numbers indicate relative peak area abundance calculated against the total peak area eluted on the chromatogram, results are expressed as mean ± standard deviation of triplicates from total analysed samples.
